# Supplementary material for: LRSSLMDA: Laplacian Regularized Sparse Subspace Learning for MiRNA-Disease Association prediction
Source: PLoS Comput Biol. 2017 Dec 18;13(12):e1005912. doi: 10.1371/journal.pcbi.1005912 (PMC5749861; doi:10.1371/journal.pcbi.1005912)
Supplement: S2 Table — (XLSX) [file pcbi.1005912.s002.xlsx]

## Sheet: Sheet1
1	1
2	1
3	1
4	2
5	2
6	2
7	3
8	3
9	3
10	3
11	3
12	3
13	3
14	3
15	4
16	4
17	4
18	4
19	4
20	4
13	5
7	6
21	6
22	6
23	6
24	6
16	6
25	6
9	6
10	6
26	6
27	6
19	6
13	6
28	6
29	6
30	6
31	6
32	6
33	6
34	6
35	6
36	6
2	6
37	6
38	6
39	6
40	6
41	6
42	6
43	6
14	6
44	6
45	6
46	6
47	6
48	6
49	6
50	6
51	6
52	6
53	6
54	6
55	6
56	6
57	6
58	6
14	7
59	8
60	8
61	8
62	8
63	8
64	8
65	8
66	8
67	8
68	8
69	8
70	8
11	8
28	8
29	8
71	8
72	8
32	8
73	8
74	8
75	8
44	8
76	8
48	8
49	8
77	8
78	8
79	8
80	8
81	8
82	8
83	8
84	8
85	8
86	8
87	8
88	8
89	8
90	8
91	8
92	8
93	8
94	8
95	8
96	8
97	8
98	8
99	8
100	8
101	8
102	8
103	8
104	8
105	8
106	8
107	8
55	8
108	8
109	9
38	9
40	9
44	9
110	9
111	9
112	9
113	9
114	10
36	10
38	10
40	10
44	10
115	10
116	10
111	10
7	11
117	11
118	11
119	11
109	11
120	11
15	11
65	11
24	11
114	11
121	11
16	11
25	11
122	11
123	11
9	11
10	11
18	11
69	11
19	11
124	11
13	11
28	11
33	11
35	11
36	11
2	11
38	11
39	11
40	11
44	11
125	11
126	11
127	11
128	11
129	11
79	11
130	11
131	11
132	11
133	11
134	11
135	11
53	11
54	11
116	11
111	11
136	11
137	11
106	11
34	12
138	12
14	12
82	12
14	13
88	13
14	14
120	15
65	15
46	15
139	15
60	16
21	16
120	16
140	16
141	16
65	16
142	16
122	16
143	16
18	16
144	16
28	16
145	16
36	16
43	16
14	16
5	16
6	16
146	16
147	16
148	16
69	17
13	17
149	17
150	18
26	19
49	19
43	20
138	21
75	22
43	22
124	23
142	24
69	24
70	24
27	24
151	24
152	24
153	24
14	25
15	26
16	26
14	26
5	26
6	26
154	26
79	26
80	26
81	26
155	26
156	26
36	27
149	27
80	27
8	28
36	28
14	28
149	28
80	28
15	29
16	29
157	30
12	30
18	31
12	31
141	32
121	32
18	32
19	32
12	32
13	32
71	32
158	32
75	32
40	32
47	32
159	32
88	32
160	32
161	32
3	32
7	33
117	33
118	33
119	33
59	33
162	33
163	33
164	33
24	33
18	33
68	33
69	33
70	33
27	33
19	33
46	33
127	33
151	33
22	34
140	34
141	34
16	34
122	34
165	34
166	34
11	34
124	34
29	34
167	34
14	34
46	34
168	34
130	34
169	34
170	34
109	35
171	35
24	35
172	35
16	35
17	35
9	35
10	35
18	35
68	35
27	35
19	35
28	35
14	35
44	35
46	35
125	35
173	35
6	35
86	35
88	35
174	35
58	35
16	36
17	36
175	36
68	36
19	36
176	36
34	36
158	36
75	36
47	36
79	36
80	36
81	36
155	36
177	36
178	36
179	36
1	37
20	37
168	37
22	38
120	38
180	38
121	38
157	38
18	38
68	38
70	38
12	38
124	38
29	38
181	38
34	38
14	38
182	38
168	38
126	38
77	38
160	38
183	38
184	38
185	38
111	38
178	38
186	38
187	38
188	38
189	38
190	38
106	38
55	38
56	38
57	38
13	39
8	40
28	40
71	40
158	40
75	40
43	40
191	40
192	40
193	40
194	40
195	40
52	40
136	40
196	40
106	40
55	40
7	41
8	41
9	41
10	41
124	41
33	41
2	41
37	41
38	41
39	41
40	41
14	41
47	41
50	41
131	41
52	41
178	41
18	42
19	42
5	43
6	43
162	44
164	44
197	44
10	44
198	44
138	44
125	44
199	44
92	44
148	44
108	44
200	45
164	46
14	46
154	47
44	48
180	49
14	49
125	49
201	49
88	49
148	49
202	49
7	50
117	50
118	50
119	50
59	50
162	50
163	50
164	50
109	50
60	50
21	50
203	50
120	50
140	50
171	50
23	50
15	50
204	50
141	50
205	50
206	50
207	50
1	50
65	50
24	50
172	50
142	50
208	50
180	50
121	50
209	50
16	50
17	50
25	50
210	50
122	50
123	50
157	50
8	50
9	50
10	50
211	50
18	50
68	50
212	50
213	50
69	50
70	50
166	50
26	50
214	50
27	50
144	50
19	50
12	50
13	50
28	50
215	50
216	50
29	50
30	50
31	50
217	50
71	50
72	50
32	50
218	50
176	50
34	50
35	50
36	50
2	50
167	50
138	50
219	50
158	50
75	50
220	50
37	50
38	50
39	50
221	50
40	50
41	50
42	50
150	50
43	50
222	50
14	50
44	50
110	50
45	50
223	50
76	50
224	50
46	50
125	50
47	50
225	50
226	50
168	50
126	50
227	50
48	50
149	50
49	50
77	50
78	50
173	50
228	50
229	50
5	50
6	50
154	50
128	50
129	50
191	50
230	50
199	50
231	50
79	50
80	50
81	50
155	50
50	50
232	50
233	50
234	50
235	50
82	50
236	50
237	50
83	50
201	50
177	50
130	50
84	50
238	50
239	50
86	50
87	50
88	50
51	50
146	50
240	50
241	50
242	50
194	50
243	50
131	50
134	50
195	50
244	50
245	50
246	50
247	50
248	50
52	50
249	50
250	50
251	50
252	50
94	50
178	50
253	50
254	50
255	50
169	50
3	50
96	50
256	50
257	50
258	50
259	50
260	50
261	50
262	50
263	50
264	50
265	50
266	50
267	50
196	50
268	50
269	50
270	50
271	50
272	50
273	50
274	50
275	50
276	50
190	50
200	50
106	50
277	50
278	50
148	50
279	50
55	50
56	50
280	50
172	51
18	51
19	51
28	51
71	51
158	51
75	51
43	51
55	51
56	51
40	52
190	52
7	53
164	53
120	53
171	53
23	53
65	53
165	53
175	53
10	53
68	53
166	53
19	53
13	53
30	53
31	53
281	53
33	53
37	53
38	53
39	53
42	53
43	53
14	53
110	53
46	53
125	53
168	53
191	53
230	53
199	53
231	53
282	53
283	53
79	53
50	53
88	53
192	53
193	53
194	53
131	53
246	53
280	53
120	54
1	54
123	54
157	54
10	54
28	54
145	54
181	54
30	54
31	54
71	54
72	54
75	54
284	54
154	54
285	54
91	54
286	54
287	54
288	54
289	54
290	54
291	54
292	54
293	54
294	54
295	54
296	54
275	54
56	54
14	55
8	56
30	56
31	56
37	56
38	56
52	56
280	56
230	57
150	58
14	58
112	58
7	59
117	59
118	59
119	59
59	59
162	59
163	59
164	59
109	59
60	59
21	59
197	59
22	59
120	59
140	59
171	59
23	59
15	59
297	59
204	59
298	59
299	59
300	59
141	59
301	59
1	59
65	59
24	59
172	59
302	59
208	59
180	59
303	59
304	59
114	59
305	59
17	59
306	59
25	59
165	59
123	59
157	59
8	59
175	59
143	59
10	59
18	59
68	59
213	59
69	59
70	59
11	59
26	59
27	59
19	59
12	59
124	59
13	59
28	59
216	59
29	59
145	59
181	59
30	59
31	59
217	59
71	59
72	59
307	59
32	59
33	59
176	59
36	59
2	59
167	59
4	59
138	59
219	59
158	59
75	59
37	59
38	59
39	59
221	59
40	59
42	59
308	59
20	59
43	59
222	59
14	59
44	59
309	59
182	59
110	59
310	59
311	59
223	59
76	59
224	59
46	59
125	59
47	59
225	59
168	59
227	59
48	59
312	59
149	59
77	59
173	59
5	59
6	59
154	59
128	59
230	59
199	59
79	59
80	59
81	59
155	59
50	59
234	59
235	59
82	59
236	59
237	59
313	59
83	59
201	59
314	59
130	59
84	59
87	59
159	59
88	59
146	59
315	59
89	59
240	59
241	59
316	59
317	59
193	59
194	59
131	59
132	59
91	59
318	59
183	59
244	59
92	59
246	59
247	59
185	59
54	59
250	59
251	59
252	59
116	59
111	59
151	59
178	59
319	59
320	59
136	59
321	59
254	59
169	59
161	59
3	59
322	59
323	59
324	59
325	59
112	59
326	59
327	59
328	59
329	59
330	59
263	59
264	59
266	59
196	59
331	59
332	59
269	59
333	59
334	59
335	59
295	59
187	59
147	59
336	59
271	59
337	59
338	59
273	59
339	59
340	59
104	59
341	59
106	59
107	59
153	59
342	59
55	59
202	59
56	59
280	59
343	59
113	59
58	59
19	60
14	60
7	61
117	61
119	61
163	61
109	61
60	61
22	61
171	61
15	61
141	61
344	61
207	61
1	61
65	61
24	61
114	61
17	61
306	61
25	61
210	61
165	61
9	61
10	61
18	61
68	61
69	61
166	61
11	61
26	61
214	61
19	61
12	61
124	61
13	61
28	61
216	61
30	61
31	61
345	61
176	61
34	61
2	61
138	61
219	61
38	61
39	61
42	61
14	61
44	61
182	61
110	61
223	61
46	61
125	61
47	61
77	61
78	61
6	61
154	61
79	61
155	61
156	61
177	61
346	61
87	61
88	61
51	61
146	61
315	61
243	61
91	61
347	61
135	61
52	61
53	61
54	61
252	61
348	61
151	61
178	61
169	61
3	61
265	61
266	61
267	61
196	61
331	61
349	61
272	61
200	61
106	61
56	61
148	61
280	61
343	61
77	62
7	63
117	63
118	63
119	63
59	63
162	63
163	63
164	63
109	63
60	63
120	63
23	63
204	63
350	63
141	63
351	63
24	63
172	63
352	63
208	63
180	63
305	63
306	63
25	63
165	63
123	63
8	63
175	63
9	63
143	63
10	63
18	63
68	63
11	63
26	63
214	63
19	63
13	63
281	63
36	63
2	63
138	63
219	63
158	63
37	63
38	63
39	63
40	63
41	63
42	63
150	63
14	63
44	63
45	63
223	63
76	63
225	63
126	63
149	63
49	63
77	63
154	63
230	63
199	63
81	63
155	63
234	63
235	63
130	63
238	63
88	63
51	63
146	63
160	63
240	63
241	63
242	63
91	63
286	63
287	63
288	63
289	63
290	63
291	63
292	63
293	63
183	63
247	63
52	63
252	63
94	63
95	63
326	63
152	63
353	63
354	63
272	63
273	63
105	63
200	63
106	63
355	63
148	63
55	63
56	63
113	63
58	63
118	64
109	64
65	64
9	64
10	64
356	64
138	64
14	64
6	64
88	64
119	65
164	65
109	65
60	65
22	65
120	65
171	65
23	65
15	65
141	65
1	65
65	65
24	65
180	65
114	65
16	65
17	65
122	65
165	65
157	65
175	65
9	65
10	65
18	65
69	65
19	65
12	65
13	65
216	65
29	65
181	65
30	65
281	65
357	65
71	65
72	65
176	65
36	65
167	65
75	65
39	65
40	65
42	65
43	65
222	65
14	65
44	65
358	65
110	65
223	65
125	65
47	65
227	65
77	65
78	65
173	65
154	65
79	65
155	65
50	65
88	65
51	65
146	65
160	65
131	65
92	65
246	65
178	65
319	65
169	65
3	65
322	65
359	65
97	65
295	65
276	65
278	65
360	65
148	65
55	65
15	66
16	66
11	66
138	66
308	66
91	66
138	67
219	67
14	67
110	67
77	67
164	68
24	68
19	68
2	68
14	68
3	68
15	69
65	69
16	69
11	69
29	69
36	69
138	69
308	69
14	69
110	69
168	69
126	69
227	69
78	69
148	69
14	70
88	70
46	71
125	71
117	72
306	73
193	74
194	74
19	75
149	75
228	75
89	75
141	76
18	76
166	76
2	76
136	76
141	77
223	78
223	79
120	80
76	80
168	80
18	81
141	82
24	82
8	82
361	82
38	82
39	82
14	82
110	82
48	82
149	82
316	82
194	82
362	82
7	83
14	83
46	83
93	84
15	85
8	86
10	86
219	86
88	86
6	87
119	88
141	88
216	88
182	88
19	89
24	90
9	90
10	90
19	90
14	90
363	90
22	91
24	91
10	91
28	91
7	92
117	92
118	92
119	92
59	92
162	92
163	92
164	92
60	92
22	92
120	92
140	92
23	92
15	92
1	92
65	92
24	92
172	92
142	92
208	92
121	92
17	92
122	92
157	92
8	92
175	92
9	92
10	92
18	92
27	92
19	92
12	92
13	92
28	92
71	92
32	92
33	92
158	92
75	92
38	92
39	92
42	92
43	92
14	92
223	92
224	92
46	92
47	92
126	92
227	92
173	92
5	92
6	92
230	92
79	92
81	92
50	92
364	92
314	92
88	92
240	92
241	92
135	92
53	92
178	92
254	92
161	92
325	92
256	92
365	92
366	92
270	92
338	92
367	92
273	92
368	92
148	92
55	92
7	93
117	93
118	93
59	93
21	93
203	93
22	93
140	93
23	93
15	93
369	93
204	93
141	93
63	93
65	93
24	93
172	93
370	93
371	93
372	93
180	93
304	93
114	93
16	93
17	93
25	93
210	93
122	93
123	93
157	93
8	93
175	93
9	93
143	93
10	93
18	93
68	93
198	93
69	93
70	93
166	93
11	93
27	93
19	93
13	93
28	93
216	93
29	93
30	93
31	93
357	93
345	93
71	93
72	93
307	93
218	93
176	93
35	93
36	93
2	93
138	93
219	93
158	93
75	93
37	93
38	93
39	93
40	93
150	93
308	93
43	93
14	93
44	93
358	93
309	93
45	93
373	93
223	93
76	93
224	93
46	93
125	93
225	93
168	93
48	93
149	93
49	93
77	93
78	93
127	93
374	93
5	93
128	93
79	93
50	93
234	93
83	93
177	93
314	93
130	93
346	93
84	93
238	93
85	93
239	93
86	93
87	93
88	93
51	93
146	93
89	93
242	93
193	93
194	93
131	93
91	93
174	93
246	93
52	93
252	93
95	93
116	93
178	93
136	93
321	93
169	93
3	93
265	93
295	93
375	93
349	93
270	93
271	93
272	93
275	93
376	93
189	93
200	93
106	93
355	93
148	93
55	93
202	93
56	93
57	93
280	93
113	93
19	94
15	95
204	95
24	95
114	95
306	95
216	95
2	95
4	95
14	95
46	95
125	95
239	95
88	95
316	95
3	95
377	95
55	95
18	96
59	97
162	97
22	97
140	97
24	97
13	97
32	97
2	97
73	97
138	97
38	97
39	97
168	97
5	97
89	97
335	97
14	98
126	98
78	98
80	98
19	99
138	100
234	100
235	100
82	100
236	100
177	100
54	100
323	100
121	101
182	101
378	101
19	102
14	102
128	102
65	103
14	103
19	104
24	105
18	105
19	105
14	105
154	105
128	105
234	105
131	105
112	105
201	106
21	107
140	107
24	107
9	107
143	107
18	107
12	107
32	107
167	107
222	107
14	107
47	107
227	107
234	107
116	107
178	107
113	107
33	108
37	108
38	108
39	108
14	108
5	108
6	108
154	108
379	108
252	108
38	109
7	110
117	110
118	110
119	110
59	110
162	110
163	110
164	110
15	111
16	111
150	111
63	112
19	112
204	113
33	113
78	114
380	115
36	116
14	116
125	116
49	116
130	116
18	117
19	118
7	119
117	119
118	119
119	119
59	119
162	119
163	119
164	119
109	119
21	119
203	119
15	119
141	119
65	119
305	119
8	119
175	119
68	119
69	119
27	119
144	119
19	119
30	119
31	119
345	119
72	119
176	119
34	119
35	119
219	119
37	119
38	119
39	119
41	119
42	119
308	119
14	119
44	119
77	119
78	119
154	119
81	119
91	119
52	119
272	119
381	119
148	119
280	119
113	119
7	120
117	120
118	120
119	120
59	120
162	120
163	120
164	120
109	120
171	120
23	120
15	120
1	120
65	120
24	120
25	120
210	120
8	120
175	120
9	120
10	120
11	120
28	120
176	120
35	120
73	120
138	120
37	120
38	120
39	120
221	120
40	120
43	120
224	120
47	120
168	120
126	120
154	120
146	120
240	120
241	120
131	120
135	120
52	120
54	120
151	120
359	120
152	120
265	120
266	120
267	120
196	120
331	120
382	120
383	120
268	120
349	120
200	120
384	120
385	120
113	120
58	120
60	121
308	121
48	121
5	121
46	122
118	123
120	123
121	123
175	123
143	123
10	123
18	123
68	123
176	123
34	123
40	123
14	123
44	123
358	123
182	123
125	123
47	123
6	123
79	123
238	123
240	123
131	123
386	123
137	123
106	123
55	123
119	124
25	124
28	124
40	124
242	124
195	124
151	124
387	124
252	125
7	126
117	126
118	126
109	126
60	126
63	126
24	126
388	126
180	126
114	126
305	126
389	126
16	126
210	126
8	126
9	126
10	126
18	126
69	126
11	126
19	126
12	126
31	126
33	126
176	126
2	126
73	126
138	126
158	126
37	126
39	126
40	126
42	126
43	126
14	126
44	126
110	126
224	126
47	126
48	126
149	126
77	126
127	126
173	126
154	126
191	126
283	126
80	126
50	126
86	126
88	126
51	126
146	126
131	126
247	126
252	126
94	126
95	126
294	126
178	126
3	126
330	126
262	126
390	126
349	126
391	126
392	126
384	126
393	126
394	126
55	126
343	126
113	126
58	126
42	127
14	127
281	128
145	129
298	130
124	130
30	130
31	130
310	130
373	130
191	130
204	131
13	131
88	131
23	132
204	132
14	132
88	132
395	132
19	133
194	134
267	134
33	135
14	135
5	135
6	135
154	135
14	136
306	137
19	138
260	139
170	139
396	139
354	139
279	139
69	140
168	140
316	140
52	140
19	141
7	142
163	142
140	142
15	142
141	142
24	142
17	142
175	142
18	142
69	142
27	142
72	142
2	142
37	142
38	142
39	142
308	142
46	142
125	142
50	142
84	142
131	142
252	142
362	142
169	142
106	142
343	142
18	143
225	144
7	145
119	145
60	145
22	145
171	145
[truncated: 3,430 more rows]
